# Supplementary material for: Genome-wide analysis of ATP-binding cassette transporters sheds light on the genes related to bioactive metabolite transportation in Salvia miltiorrhiza
Source: Research Square preprint supplement (doi:10.21203/rs.3.rs-99773/v1), 2020-11-09
Supplement: Supplementary file 1 [file 6b2e3a2c1ed0217eb3aa1195.xlsx]

## Sheet: Sheet1
Gene name	Function	Gene ID
AtABCA1	pollen germination,seed germination and maturation[13]	AT2G41700
AtABCB1	auxin transport[52],herbicide resistance[30]	AT2G36910
AtABCB4	Polar auxin transport [12]	AT2G47000
AtABCB14	stomatal regulation[20], Polar auxin transport[12]	AT1G28010
AtABCB15	Polar auxin transport [12]	AT3G28345
AtABCB19	auxin polar transport[51]	AT3G28860
AtABCB21	Polar auxin transport [12]	AT3G62150
AtABCB23	F-S cluster biogenesis[47]	AT4G28630
AtABCB24	F-S cluster biogenesis[47]	AT4G28620
AtABCB25	F-S cluster biogenesis[47]	AT5G58270
AtABCB27	Aluminum tolerance[82]	AT5G39040
CjMDR1	berberine transport[48]	AB043999
CjABCB2	berberine transport[48]	AB674325
OsABCB14	auxin transport and iron homeostasis[50]	BAG96130
SlABCB4	Auxin Transport in the Developing Fruit[49]	ABX82928
AtABCC1	folate transpot, metal and metalloid tolerance[11], glutathione S-conjugate[83]	AT1G30400
AtABCC2	Metal/metalloid tolerance, chlorophyl1 catabolite transport[11]	AT2G34660
AtABCC3	heavy metal tolerance[56]	AT3G13080
AtABCC4	stomatal regulation[46]	AT2G47800
AtABCC5	stomatal regulation, phytate storage[84], Inositol Hexakisphosphate loading into seeds[11]	AT1G04120
AtABCC6	early step of seeding development and Cadmium tolerance[55]	AT3G13090
AtABCC7	Cadmium tolerance[71]	AT3G13100
ZmMRP3	anthocyanin transport[53]	AAT37905
VvABCC1	anthocyanin transport[54]	AGC23330
TaMRP1	Aluminum tolerance[70]	BAB85651
CsABCC4	vacuolar crocin accumulation in stigmas[53]	MF966954
AtABCD1	Fatty acyl-CoA import to peroxisome[11]	AT4G39850
AtABCE2	catalyze mRNA turnover[63]	AT4G19210
AtABCF3	gene expression regulation[24]	AT1G64550
AtABCG1	synthesis of an intact pollen wall [67]	AT2G39350
AtABCG2	synthesis of an effective suberin barrier in roots and seed coats [67]	AT2G37360
AtABCG6	synthesis of an effective suberin barrier in roots and seed coats [67]	AT5G13580
AtABCG11	cuticle formation, Suberin formation[11]	AT1G17840
AtABCG12	cuticle formation[11]	AT1G51500
AtABCG13	cuticle formation[11]	AT1G51500
AtABCG14	mediate root to shoot translocation of tZ-type cytokinins[68]	AT1G31770
AtABCG16	synthesis of an intact pollen wall [67]	AT3G55090
AtABCG19	kanamycin tolerance[11]	AT3G55130
AtABCG20	synthesis of an effective suberin barrier in roots and seed coats [67]	AT3G53510
AtABCG22	stomatal regulation and drought susceptibility[39]	AT5G06530
AtABCG25	ABA export[31]	AT1G71960
AtABCG26	pollen exine formation[16]	AT3G13220
AtABCG29	p-coumaryl alcohol transporter,Lignin Biosynthesis[66]	AT3G16340
AtABCG32	cuticle formation[11]	AT2G26910
AtABCG34	mediating the secretion of camalexin[72]	AT2G36380
AtABCG36	IBA transport[42], nonhost pathogen resistance[36], Biotic and abiotic stress tolerance[11]	AT1G59870
AtABCG37	IBA transport[42], auxinic ompound[40]	AT3G53480
AtABCG39	herbicide tolerance[73]	AT1G66950
AtABCG40	ABA transport[11],Pb resistance[35]	AT1G15520
Lr34	multiple fungal pathogen resistance[74]	ACN41354
CrTPT2	catharanthine transport[58]	KC511771
CsPDR8	hormone response[76]	ACU82514
CsPDR12	hormone response[76]	ACU82515
SpTUR2	sclareol transport[41]	CAA94437
StPDR2	response to pathogens and abiotic stresses[77]	AEB65936
NpPDR1	sclareol transport[78]	Q949G3
NtPDR1	diterpenes transport[79]	BAD07483
NtPDR3	Iron deficiency response[80]	CAH39853
NbABCG1	capsidiol transport[85]	BAR94041
PgPDR3	ginsenosides accumulation[57]	AGT28055
PhPDR2	petuniasterone and petuniolide secretion[86]	AOF42830
OsPDR9	stress response[88]	CAD59568
GhWBC1	cotton yain expansion[81]	AAP80385
AtABCI1	cytochrome c maturation[61]	AT1G63270
AtABCI6	Fe-S cluster biogeneses[62]	AT3G10670
AtABCI7	Fe-S cluster biogeneses[62]	AT1G32500
AtABCI8	Fe-S cluster biogeneses[62]	AT4G04770
AtABCI13	plastid lipid formation[11]	AT1G65410
AtABCI14	plastid lipid formation[11]	AT1G19800
AtABCI15	plastid lipid formation[11]	AT3G20320
AtABCI16	Aluminum tolerance[11]	AT2G37300
AtABCI17	Aluminum tolerance[11]	AT1G67940
