# Supplementary material for: Genome-wide analysis of ATP-binding cassette transporters sheds light on the genes related to bioactive metabolite transportation in Salvia miltiorrhiza
Source: Research Square preprint supplement (doi:10.21203/rs.3.rs-99773/v1), 2020-11-09
Supplement: Supplementary file 2 [file c2da9d8d2f5f73907b25bb11.xlsx]

## Sheet: Sheet1
Gene name	Primer name	Primer sequences
SMil_00000810	00810-qF	GAGTTATACTCGTTCGTTGT
	00810-qR	ACCTCATCTTTGTCCCATTA
SMil_00016361	16361-qF	CGAATGAAACCTCCTACCCACC
	16361-qR	ACTGTGGAAAGTCTCAGCAACA
SMil_00016360	16360-qF	GCAGCGTTCCCACTTCTCAT
	16360-qR	GCCGTCGGAATCCATGTAAGT
SMil_00017491	17491-qF	ATACGGAGCCAGACAAACAC
	17491-qR	TCGGCGTCCCTTGTAGAATC
SMil_00015518	15518-qF	ACGGGTGGTCATAGTCATCTTT
	15518-qR	TTGTGGATTGGTGGAAGTCACT
SMil_00017134	17134-qF	ACCCATGCCATGCTTCCTATT
	17134-qR	CGTTTCGCCTAAGTGAGTTTCA
SMil_00016963	16963-qF	TAAAGGAGGTGTGGCAGGG
	16963-qR	TCTATCGCCGCCCATCTCA
SMil_00020066	20066-qF	AAGTTAGCCGAAACGTGGAGAT
	20066-qR	CTCTTTGCTGCCGTTTCCATC
SMil_00001053	01053-qF	ATGGACTGTCACAGCCTCTAAT
	01053-qR	ACACCAATGGTACGATGTTCTT
SMil_00004040	04040-qF	TTGGTGGTGCCACACTCTC
	04040-qR	GGTGATCGCCGAGCAGATT
SMil_00000399	00399-qF	CCAGCATACCACGCCACTA
	00399-qR	CTGAGTGCCATCGGTTTCC
SMil_00005271	05271-qF	AGGAGTGTCACCAACCAATCTG
	05271-qR	ACAGGATGCACCGAGAAACG
SMil_00020247	20247-qF	ACTGGTCCAAACTAAGAACAC
	20247-qR	CCCGCATTTCCATTATTTGTG
SMil_00004712	04712-qF	AGCTTGAGTTGTCACTTGTCC
	04712-qR	CGATAGTAGCAGCAGCACTT
SMil_00005832	05832-qF	GCAGGAGCAGTGGAGATGGT
	05832-qR	AGCGTTGGAGTTGTTGAGGTT
SMil_00027268	27268-qF	ACTGAGAACCGGAAAAGGGG
	27268-qR	TGTCTTCCGTGGCTCCTTGA
SMil_00020022	20022-qF	CTACCGTGAGAGGGCTGCAG
	20022-qR	GAGAGTAAGCTAATGTCTGAATCGCG
SMil_00010949	10949-qF	AGAAGCTCCCCACGTTTGAT
	10949-qR	CCACATTGGTGACCAATCTCTCC
